# Supplementary material for: Internet Search Patterns of Human Immunodeficiency Virus and the Digital Divide in the Russian Federation: Infoveillance Study
Source: PubMed Central journal article supplement (PMC3841350; doi:10.2196/jmir.2936), 2013-11-12
Supplement: jmir_v15i11e256_app5.pdf [file jmir_v15i11e256_app5.pdf]

Summary of regional PCA biplots results tables

| Region             | Relationship                                                                                                                           | Geographic clusters                                                                                                                                                                                                                                                             | Outliers                                           |
|--------------------|----------------------------------------------------------------------------------------------------------------------------------------|---------------------------------------------------------------------------------------------------------------------------------------------------------------------------------------------------------------------------------------------------------------------------------|----------------------------------------------------|
| Central (A)        | PC2:<br>V1, V3 V2,V6<br>Age, education,<br>income and HIV<br>prevalence/search                                                         | Cluster 1<br>A1. Belgorod<br>A2. Bryansk<br>A4. Voronezh<br>A8. Kursk<br>A9. Lipetsk<br>A11. Orel<br>A12. Ryazan<br>A14. Tambov<br><br>Cluster 2<br>A3. Vladimir<br>A5. Ivanovo<br>A6. Kaluga<br>A7. Kostroma<br>A10. Moscow Region<br>A15. Tver<br>A16. Tula<br>A17. Yaroslavl | A18. Moscow City                                   |
| North West (B)     | PC1:<br>V1, V2, V3, V6<br>Age, education,<br>income HIV<br>search/prevalence<br><br>PC2:<br>V4, V5<br>broadband fee,<br>urbanisation   | Cluster 1<br>B6. Kaliningrad<br>B7. Leningrad<br><br>Cluster 2<br>B1. Karelia<br>B2. Komi<br>B3. Archangelsk<br>B5. Vologda<br>B8. Murmansk<br>B9. Novgorod<br>B10. Pskov                                                                                                       | B11. St Petersburg<br>B4. Nenets Autonomous Region |
| South (C)          | PC1:<br>V4, V5<br>broadband fee,<br>urbanisation,<br><br>PC2:<br>V1, V2, V3, V6<br>Age, Education,<br>income, HIV<br>prevalence/search | Cluster 1<br>C1. Adygia<br>C2. Kalmykia<br><br>Cluster 2<br>C4. Astrkhan<br>C6. Rostov                                                                                                                                                                                          | C3. Krasnodar<br>C5. Volgograd                     |
| North Caucasus (D) | PC2:<br>V1, V2, V3, V4, V5,<br>V6                                                                                                      | Cluster 1<br>D1. Dagestan<br>D3. Karbadino Balkaria<br>D4. Karachayevo cherkassia<br><br>Cluster 2<br>D2. Ingushetia<br>D6. Chechnya<br><br>Cluster 3<br>D5. North Ossetiya<br>D7. Stavropol                                                                                    | D7. Stavropol                                      |

|                 |                                                                                                                                             |                                                                                                                                                                                                                                                                                                                                     |                                 |
|-----------------|---------------------------------------------------------------------------------------------------------------------------------------------|-------------------------------------------------------------------------------------------------------------------------------------------------------------------------------------------------------------------------------------------------------------------------------------------------------------------------------------|---------------------------------|
| Volga<br>(E)    | <p>PC1:<br/>v1<br/>Age</p> <p>PC2: v2, v3, v4, v5, v6<br/>Education, income, broadband fee, urbanisation, HIV prevalence/search</p>         | <p>Cluster 1<br/>E1. Bashkortostan<br/>E2. Mariy El<br/>E5. Udmurtiya<br/>E8. Kirov<br/>E11. Penza<br/>E14. Ulyanovsk</p> <p>Cluster 2 “urban”<br/>E4. Tatarstan<br/>E9. Nizhegorod<br/>E12. Samara<br/>E13. Saratov</p> <p>Cluster3 “rural”<br/>E3. Mordovia<br/>E6. Chuvashia</p> <p>Cluster 4<br/>E10. Orenburg<br/>E7. Perm</p> | E7. Perm<br>E12. Samara         |
| Urals<br>(F)    | <p>PC1:<br/>V5, V6<br/>Urbanisation, HIV prevalence and search</p> <p>PC2:<br/>V1, V2, v3, v4<br/>Age, education, income, broadband fee</p> | <p>Cluster 1<br/>F3. Tyumen<br/>F6. Chelyabinsk</p>                                                                                                                                                                                                                                                                                 | F1. Kurgan<br>F5. Yamalo Nenets |
| Siberia<br>(G)  | <p>PC1: V2<br/>Education</p> <p>PC2: V1, v3, V4, v5, v6<br/>Age, income, broadband fee, urbanisation, HIV search and prevalence</p>         | <p>Cluster 1<br/>G2. Buryatiya<br/>G4. Khakasiya<br/>G5. Altay<br/>G6. Zabaykalya</p> <p>Cluster 2<br/>G10. Novosibirsk<br/>G11. Omsk<br/>G12. Tomsk</p> <p>CLUSTER 3<br/>G7. Krasnoyarsk</p> <p>CLUSTER 4<br/>G8. Irkutsk</p>                                                                                                      | G9. Kemerovo                    |
| Far East<br>(H) | <p>PC1:v 3, v6<br/>income and HIV prevalence/search</p> <p>PC2: v1, v2, v4,v5<br/>age, education, broadband fee, urbanisation</p>           | <p>CLUSTER 1:<br/>H5. Amursk<br/>H8. Jewish Auton. Region.</p> <p>CLUSTER 2:<br/>H3. Primorsk<br/>H4. Khabrovsk</p> <p>CLUSTER 3:<br/>H1. Sakha (Yakutia)<br/>H2. Kamchatka</p> <p>CLUSTER 4:<br/>H7. Sakhalin<br/>H9. Chukotka</p>                                                                                                 | H6. Magadan                     |
